# Supplementary material for: MiR-206 suppresses epithelial mesenchymal transition by targeting TGF-β signaling in estrogen receptor positive breast cancer cells
Source: PubMed Central journal article supplement (PMC5029720; doi:10.18632/oncotarget.8233), 2016-03-21
Supplement: oncotarget-07-24537-s001.pdf [file oncotarget-07-24537-s001.pdf]

## SUPPLEMENTARY DATA

### Primers for RT-PCR and qPCR

miR-206: sense primer: ACACTCCAGCTGGGT  
GGAATGTAAGGAAGT;

U6:sense primer: ACACTCCAGCTGGGCGCAA  
ATTCGTGAAGC;

Universal anti-sense primer for  
microRNA: CTCAACTGGTGTTCGTGGAGTCGG;

TGF- $\beta$ : sense primer: GCGATACCTCAGCA  
ACCG;

anti-sense primer: AAGGCGAAAGC  
CCTCAAT;

HIF1 $\alpha$ : sense primer: TACTCAAAGTCGGAC  
AGCC;

anti-sense primer: CAAAGCGACAGATA  
ACACG;

PLD1: sense primer: GTCATCCACCGTCTAT  
TTG;

anti-sense primer: CTGTGCTCATTGTC  
GTCCC;

DACH1: sense primer: ATCCAGCCAGGAGT  
GAACC;

anti-sense primer: GAATGCGGCATG  
ATGTGAG

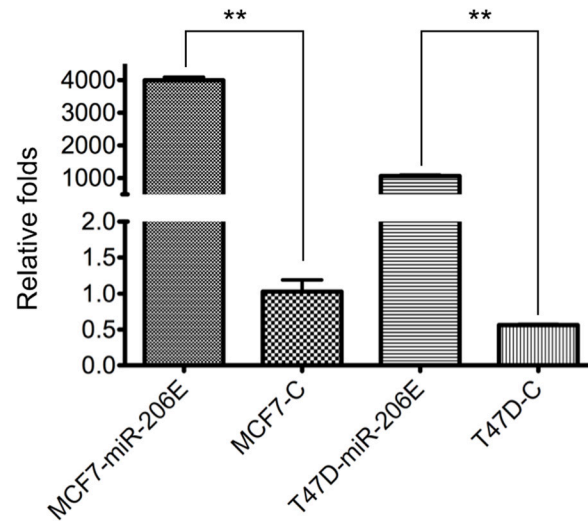

**Supplementary Figure S1: Stable transfection of miR-206 significantly promoted miR-206 expression level in both MCF-7 and T47D cells.** (\*\*:  $P < 0.001$ ). Experiments were performed 3 times. TGF- $\beta$  mRNA expression was normalized to U6 and depicted as the mean  $\pm$  S.D.

**Supplementary Table S1: Wildtype and mutant 3'-UTR segments for NRP1 and SMAD2**


---

|                      |                                                                                                                                                                                                                                  |
|----------------------|----------------------------------------------------------------------------------------------------------------------------------------------------------------------------------------------------------------------------------|
| NRP1-3'UTR-WILDTYPE  | AAATTGTTGTTTCAAATGAACAGCGAAGCCTTAACT<br>TTAAATGACATTTGTATTCTCAGACACTGAGTAGCATAAAAACCATAGAA<br>CTGAACTGTAACCTAAATTCCAAACCTATGACTACTACATTCCAAAGAAACA<br>GTTGAATTAACATTTTCATAAAATATCCCACAAA                                         |
| NRP1-3'UTR-MUTANT    | AAATTGTTGTTTCAAATGAACAGCGAAGCCTTA<br>ACTTTAAATGACATTTGTATTCTCAGACACTGAGTAGCATAAAAACCA<br>CATAGAACTGAACTGTAACCTAAATTCCAAACCTATGACTACTCACAA<br>AACAAGAAACAGTTGAATTAACATTTTCATAAAATATCCCACAAA                                       |
| SMAD2-3'UTR-WILDTYPE | TGAGGGTGGCGTAGGTTTATGTTGGGATATA<br>AAGTAACACAAGACAATCTTCACTGTACATAAAATATGTCTTCATG<br>TACAGTCTTTACTTTAAAAGCTGAACATTCCAATTTGCGCCTTCCC<br>TCCCAAGCCCCTGCCACCAAGTATCTCTTTAGATATCTAGTCTGT<br>GGACATGAACAATGAATACTTTTTTCTTACTCTGATCGAA |
| SMAD2-3'UTR-MUTANT   | TGAGGGTGGCGTAGGTTTATGTTGGGATATA<br>AAGTAACACAAGACAATCTTCACTGTACATAAAATATGTCTTCATG<br>TACAGTCTTTACTTTAAAAGCTGACACAAAACATTTGCGCCTTCC<br>CTCCCAAGCCCCTGCCACCAAGTATCTCTTTAGATATCTAGTCT<br>GTGGACATGAACAATGAATACTTTTTTCTTACTCTGATCGAA |

---
